# Supplementary material for: Semi-synthetic puwainaphycin/minutissamide cyclic lipopeptides with improved antifungal activity and limited cytotoxicity
Source: PubMed Central journal article supplement — RSC Adv. 2021 Sep 16;11(49):30873–86. doi: 10.1039/d1ra04882a (PMC9041360; doi:10.1039/d1ra04882a), 2021-09-16
Supplement: RA-011-D1RA04882A-s001.pdf [file RA-011-D1RA04882A-s001.pdf]

**Supplementary material to the article**

**Semi-synthetic puwainaphycin/minutesamide cyclic lipopeptides with improved antifungal activity and limited cytotoxicity**

Jan Hájek<sup>1,2‡</sup>, Sebastian Bieringer<sup>3‡</sup>, Kateřina Voráčová<sup>1</sup>, Markéta Macho<sup>1,2</sup>, Kumar Saurav<sup>1</sup>, Kateřina Delawská<sup>1,2</sup>, Petra Divoká<sup>1</sup>, Radovan Fišer<sup>4</sup>, Gabriela Mikušová<sup>4</sup>, José Cheel<sup>1</sup>, David P. Fewer<sup>5</sup>, Dai Long Vu<sup>1</sup>, Jindřiška Paichlová<sup>1</sup>, Herbert Riepl<sup>3\*</sup>, Pavel Hrouzek<sup>1\*</sup>

*1- Centre Algatech, Institute of Microbiology of the Czech Academy of Sciences, Opatovický mlýn, Novohradská 237, 379 81 Třeboň, Czech Republic.*

*2- Faculty of Science, University of South Bohemia in České Budějovice, Branišovská 1760, 37005, České Budějovice, Czech Republic*

*3- Campus Straubing for Biotechnology and Sustainability, Technical University Munich, 16, Schulgasse, 94315 Straubing, Germany*

*4- Faculty of Science, Charles University, Viničná 5, 128 44 Prague 2, Czech Republic.*

*5- Department of Microbiology, University of Helsinki, Biocenter 1, Viikinkaari 9, FIN-00014 Helsinki, Finland.*

‡ These authors contributed equally

\*To whom the correspondence should be sent: Pavel Hrouzek: hrouzek@alga.cz, Herbert Riepl: herbert.riepl@hswt.de

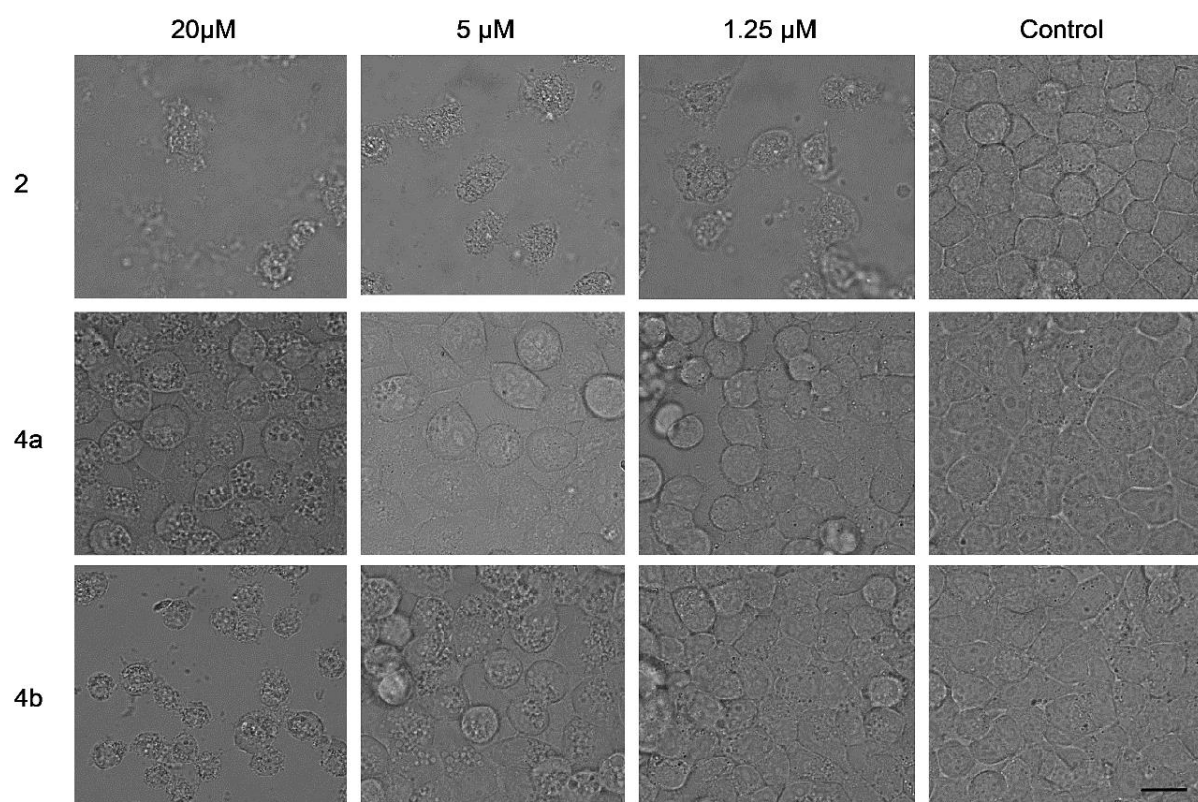

**Figure S1. The morphology of HeLa cells treated by semi-synthetic PUW/MINs (4a and 4b) and naturally occurring PUW F (2) used as reference.** Semi-synthetic compound **4b** induced clear membrane burst comparable to natural compounds **2** only at highest concentration tested (20  $\mu$ M). At concentration 5  $\mu$ M and 1.25  $\mu$ M of **4a** cytoplasmic vacuolation is observed, however, no membrane permeabilization effect was recorded. Under treatment of **4a** the cells appeared stressed (cytoplasmic vacuolation) but with not membrane burst at the end of the experiments. Scale bar represents 20  $\mu$ m. Vehicle treated cells are depicted as control.

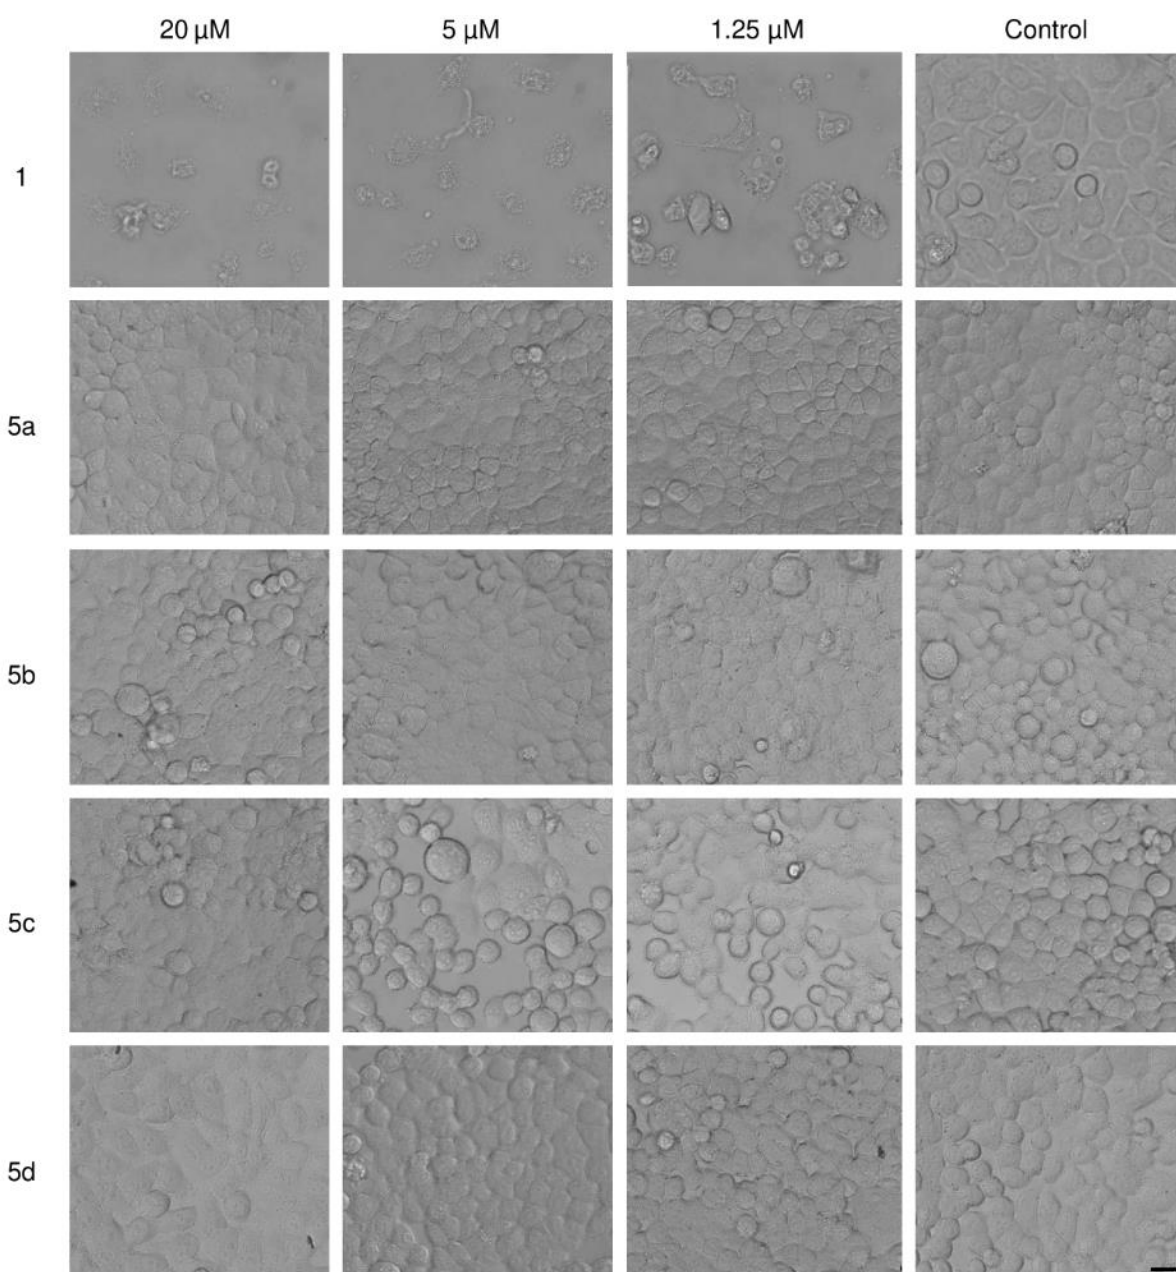

**Figure S2.** The morphology of HeLa cells treated by semi-synthetic PUW/MINs (5a-5c) and naturally occurring MIN A (1) used as reference. In case of all esterified variants (5b-5d) no morphology alteration has been observed. Scale bar represents 20  $\mu$ m.

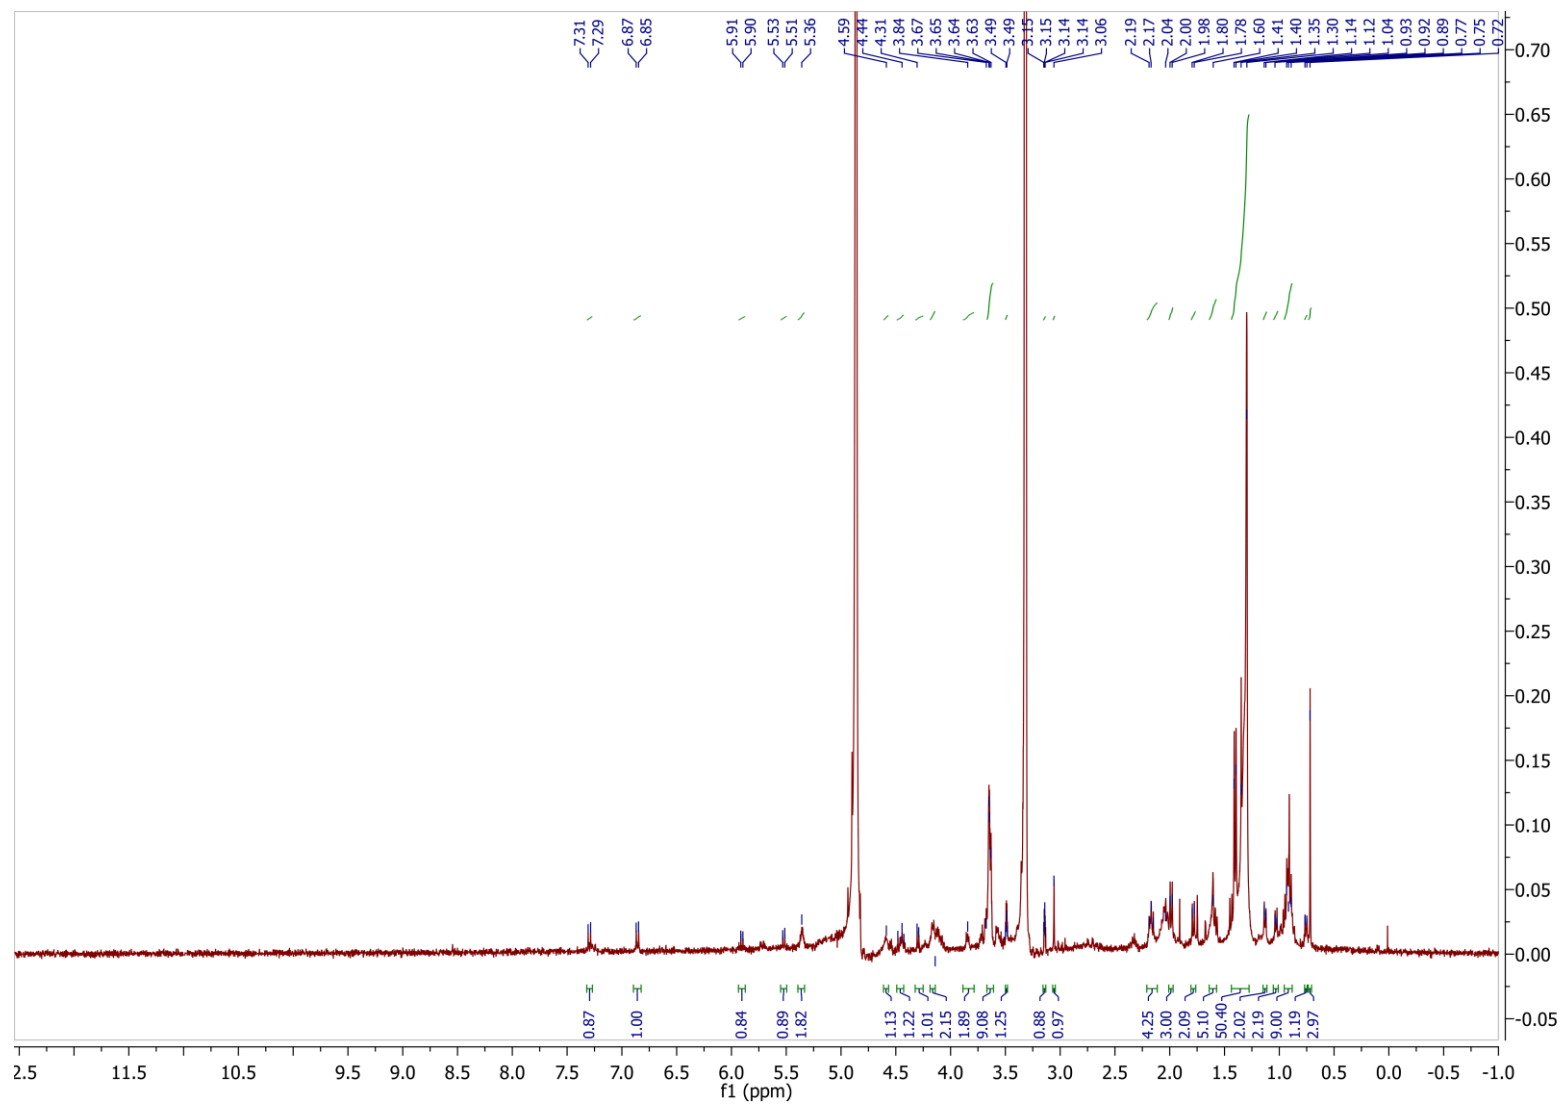

Figure S3. <sup>1</sup>H NMR spectrum of compound 4a

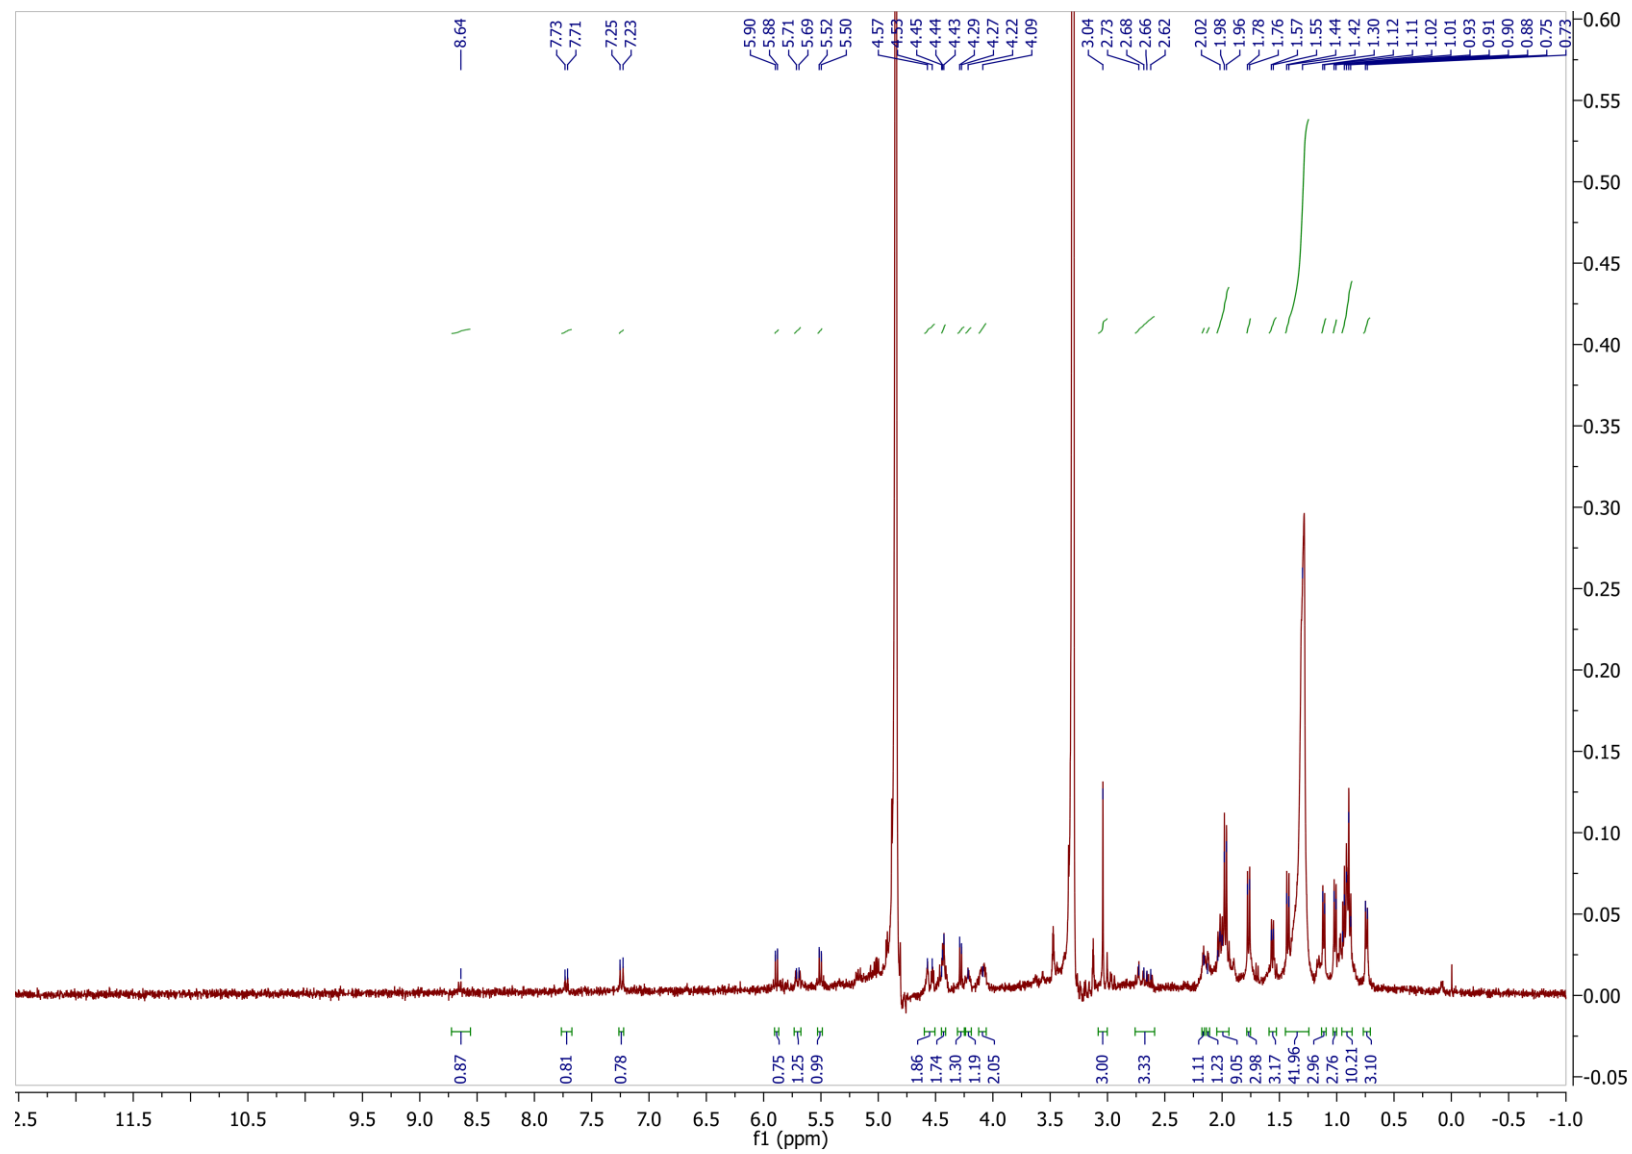

Figure S4.  $^1\text{H}$  NMR spectrum of compound **4b**

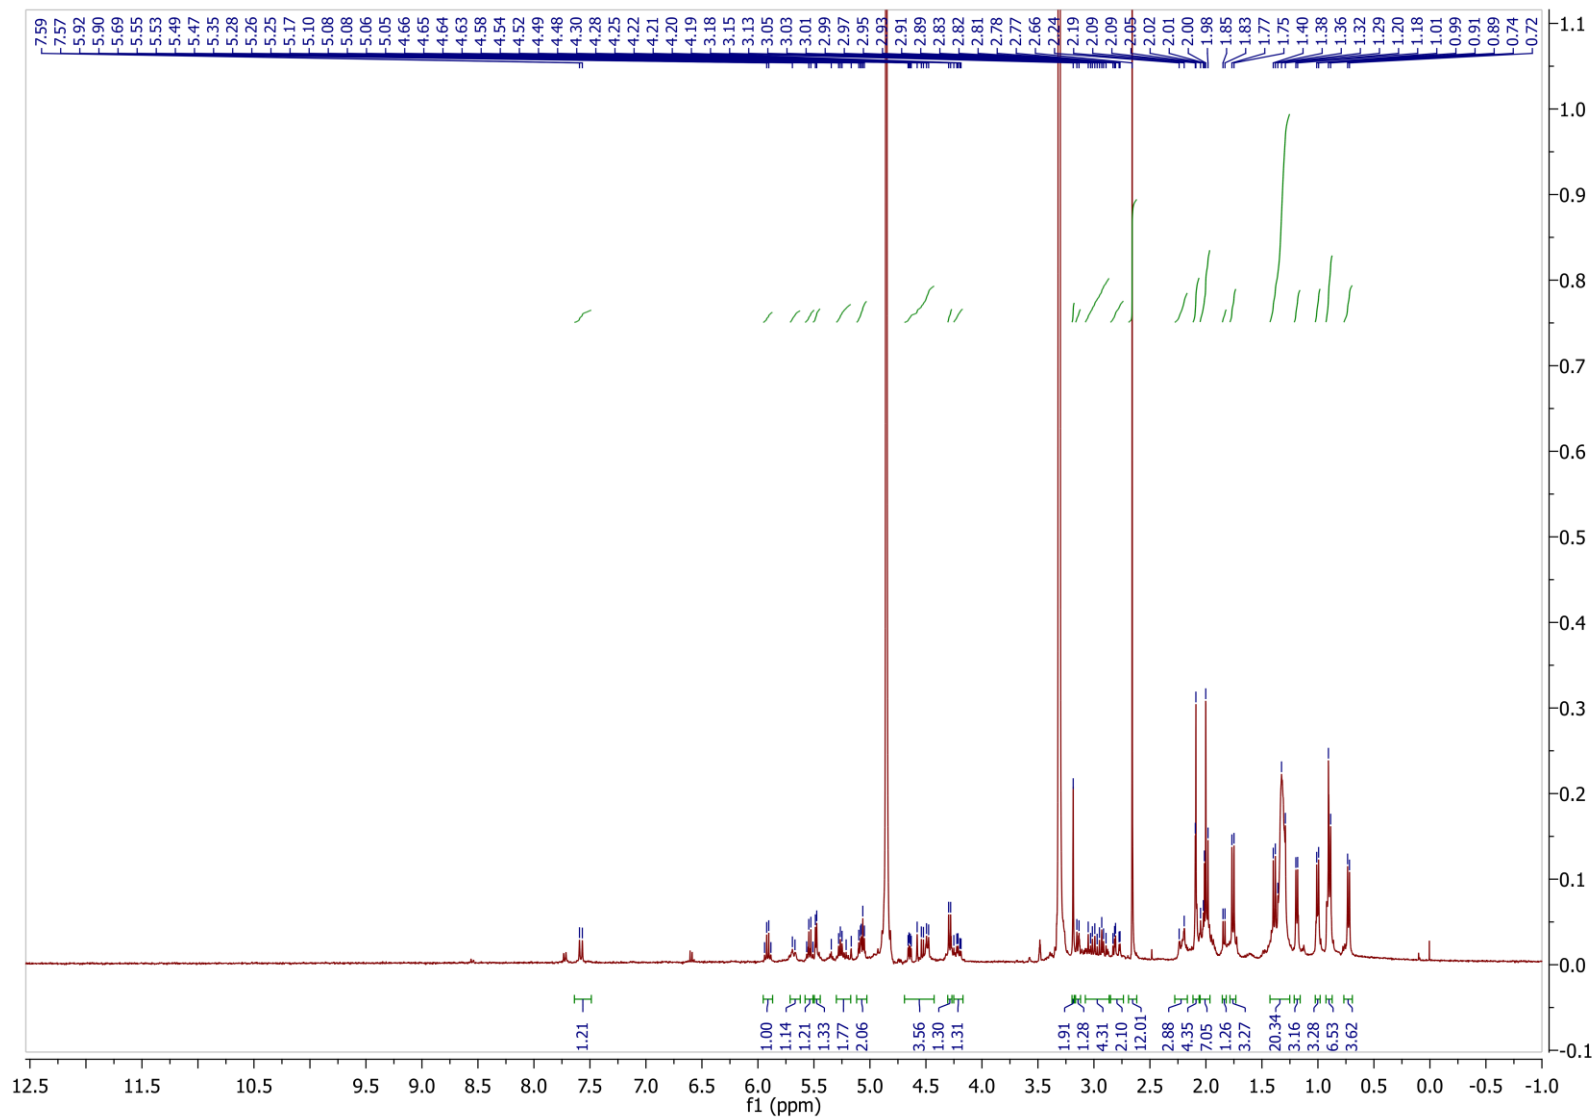

Figure S5. <sup>1</sup>H NMR spectrum of compound 5a

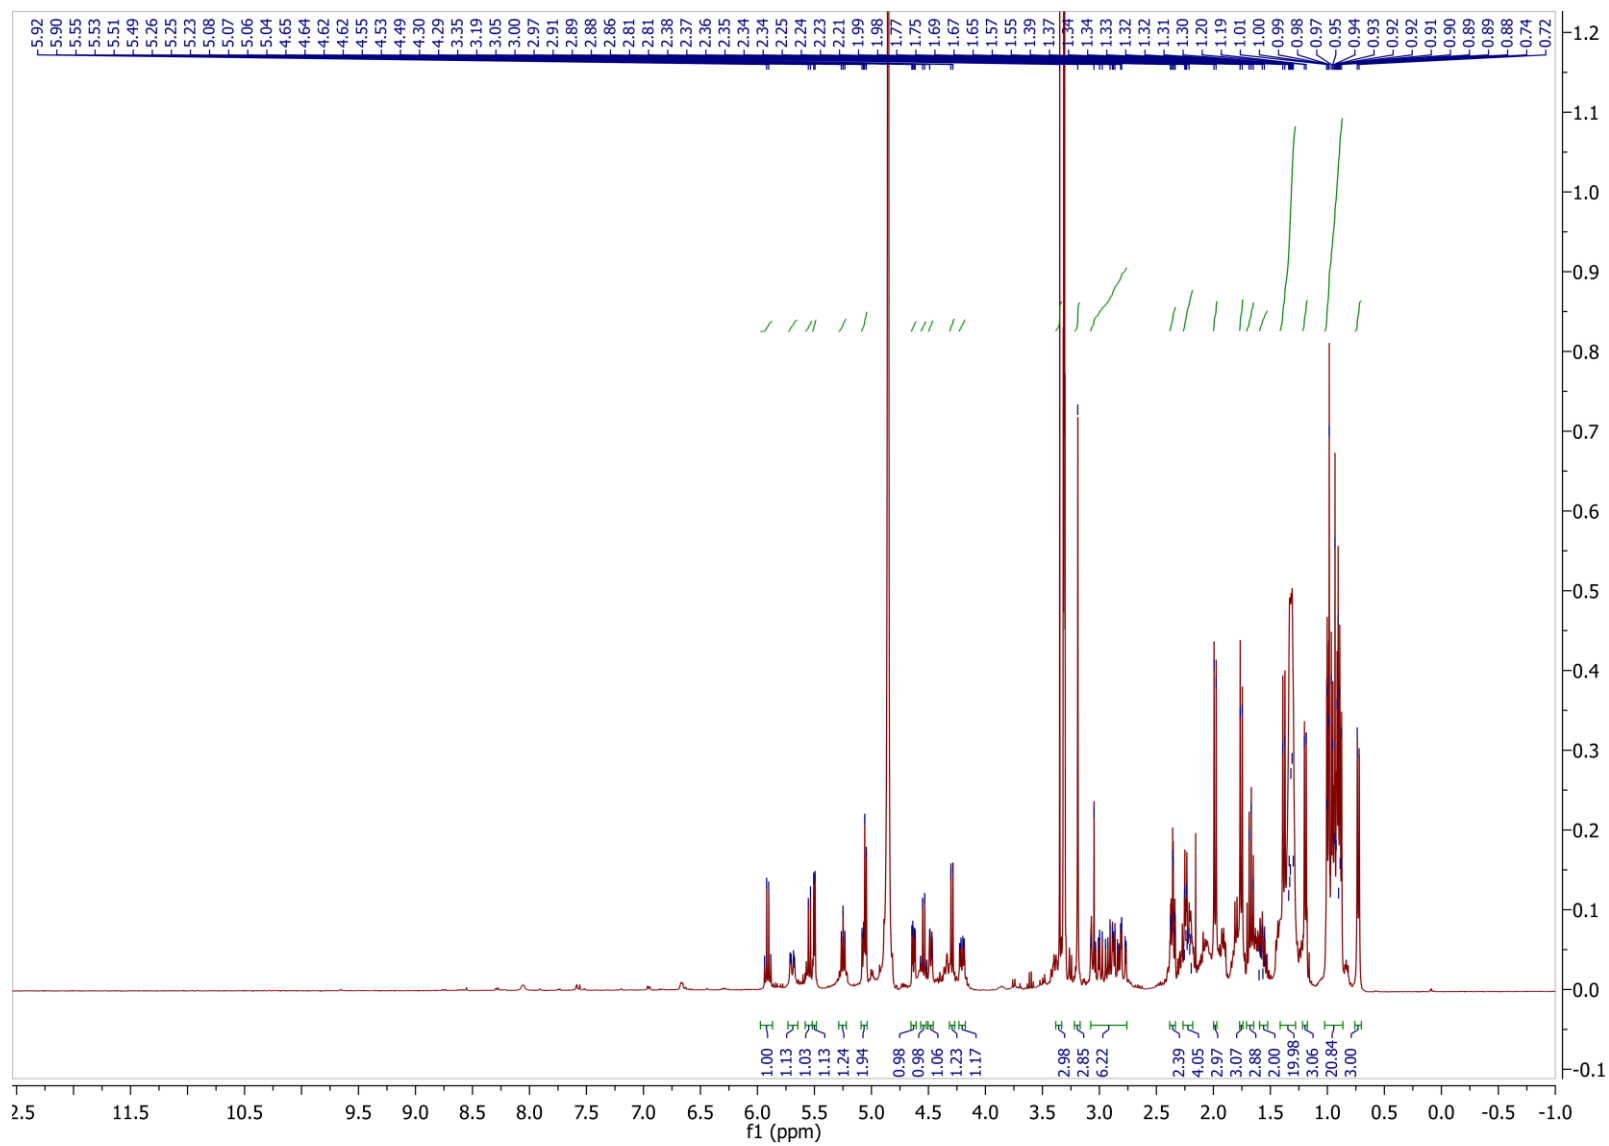

Figure S6. <sup>1</sup>H NMR spectrum of compound 5b

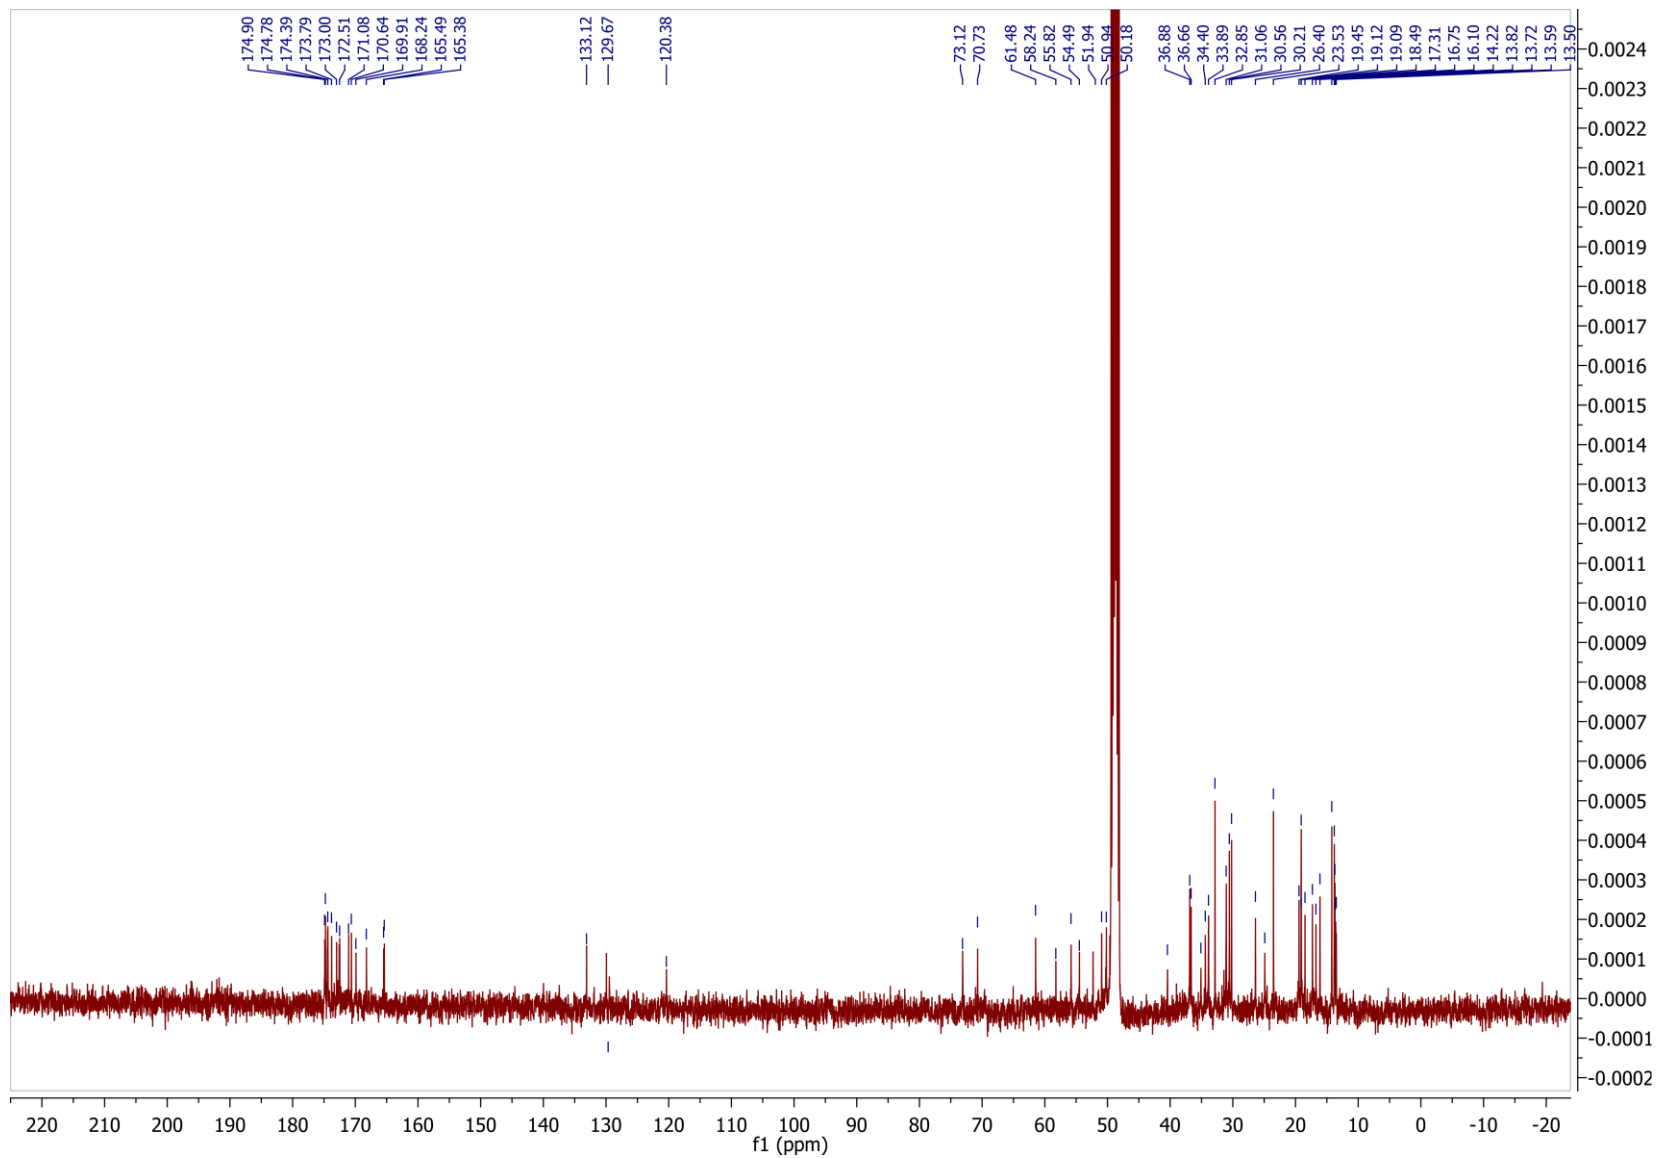

Figure S7.  $^{13}\text{C}$  NMR spectrum of compound 5b



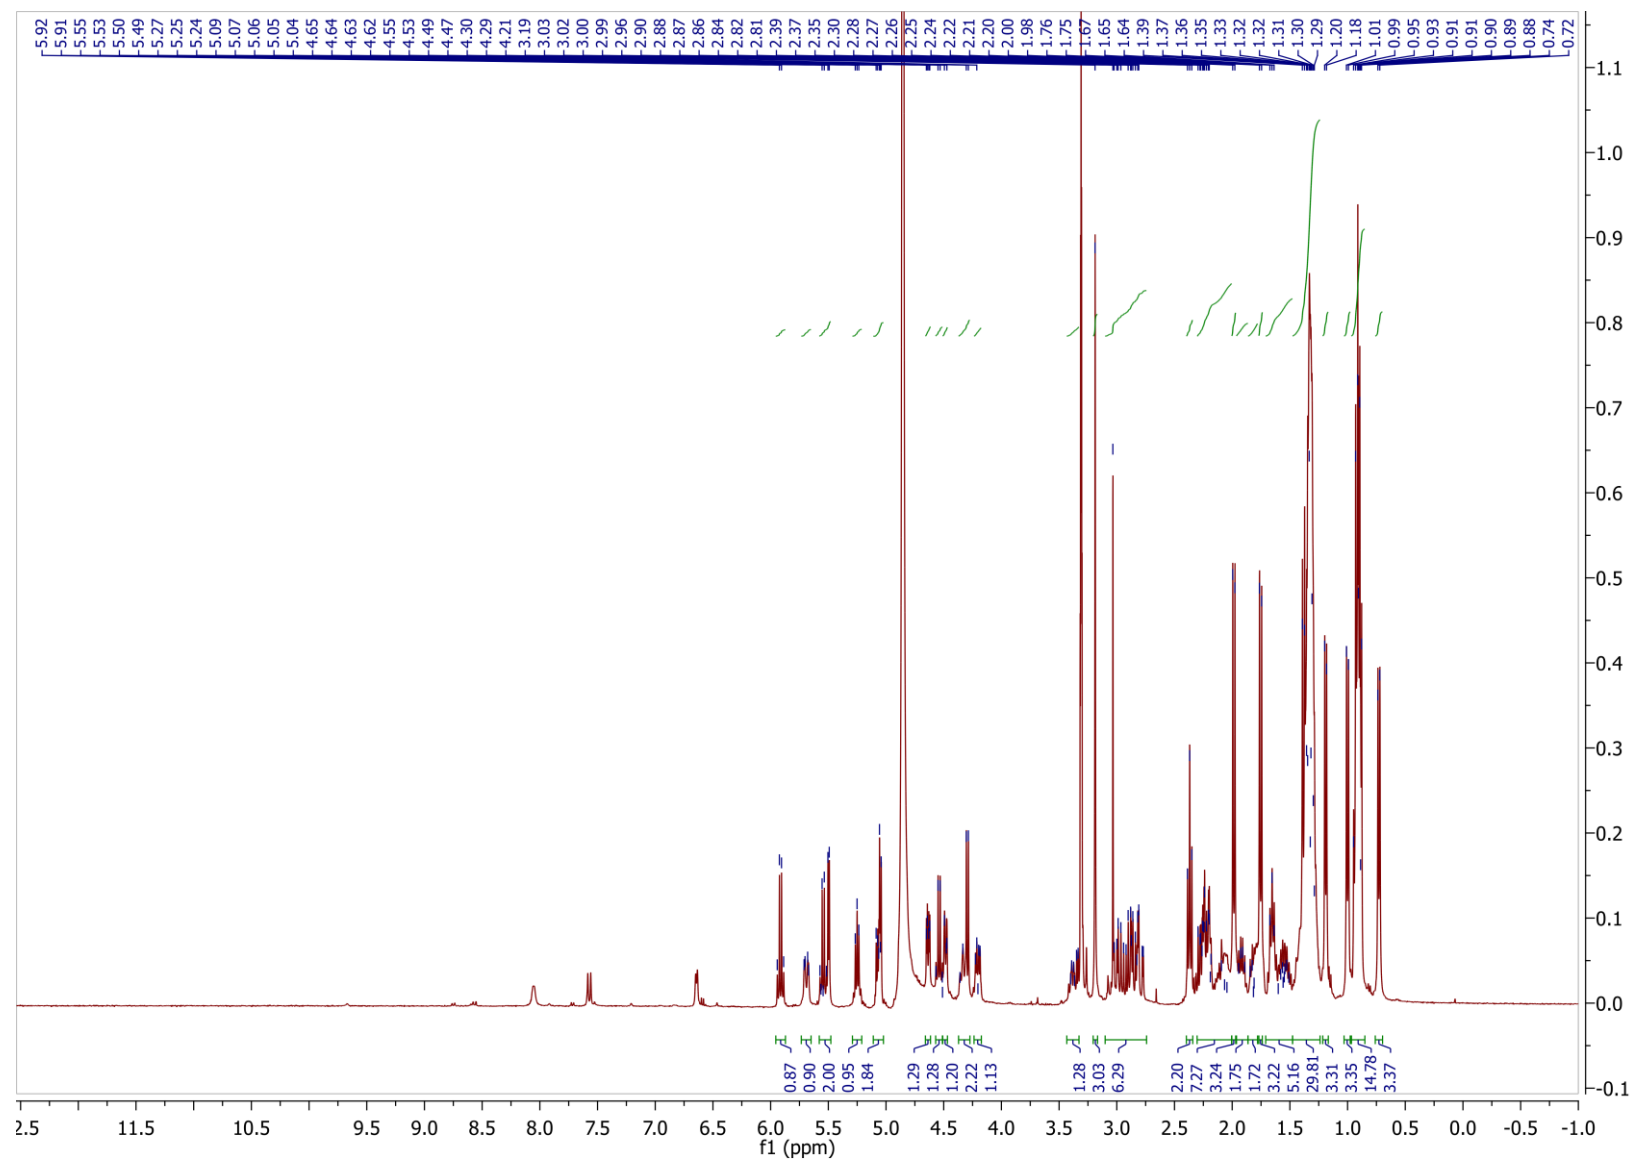

Figure S8. <sup>1</sup>H NMR spectrum of compound 5c

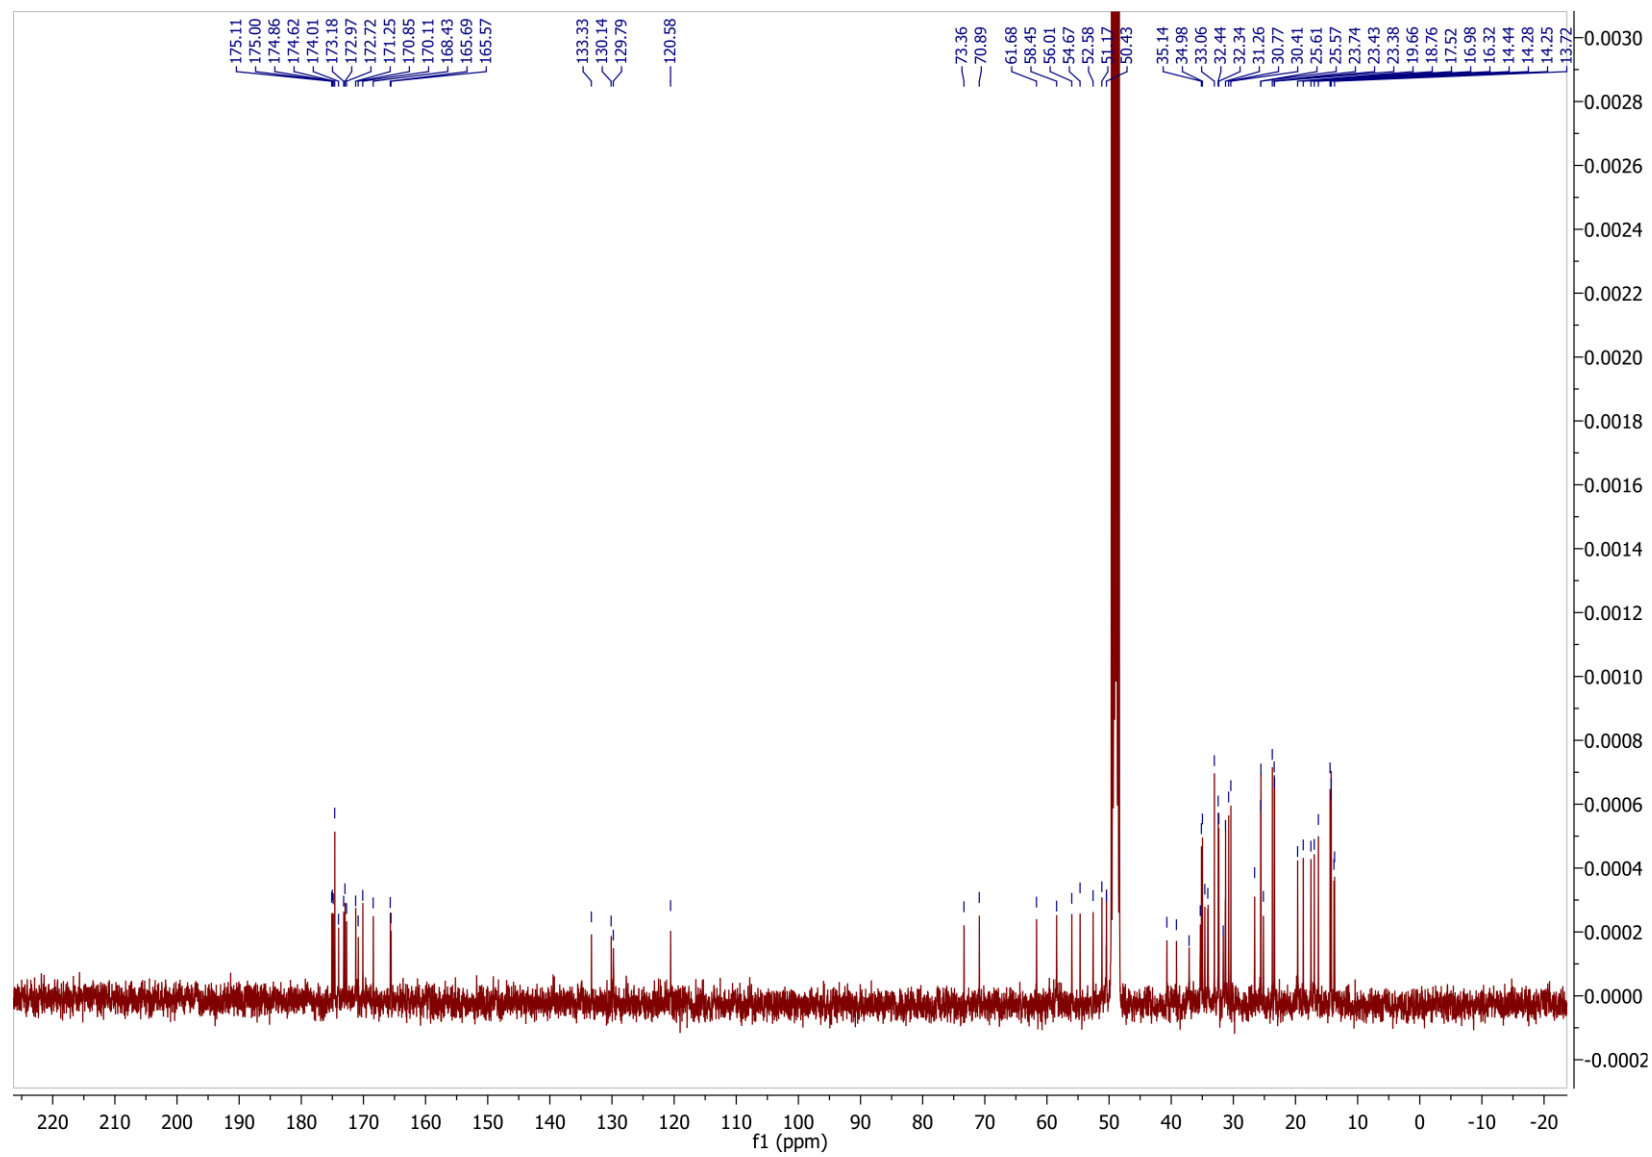

**Figure S9.**  $^{13}\text{C}$  NMR spectrum of compound **5c**

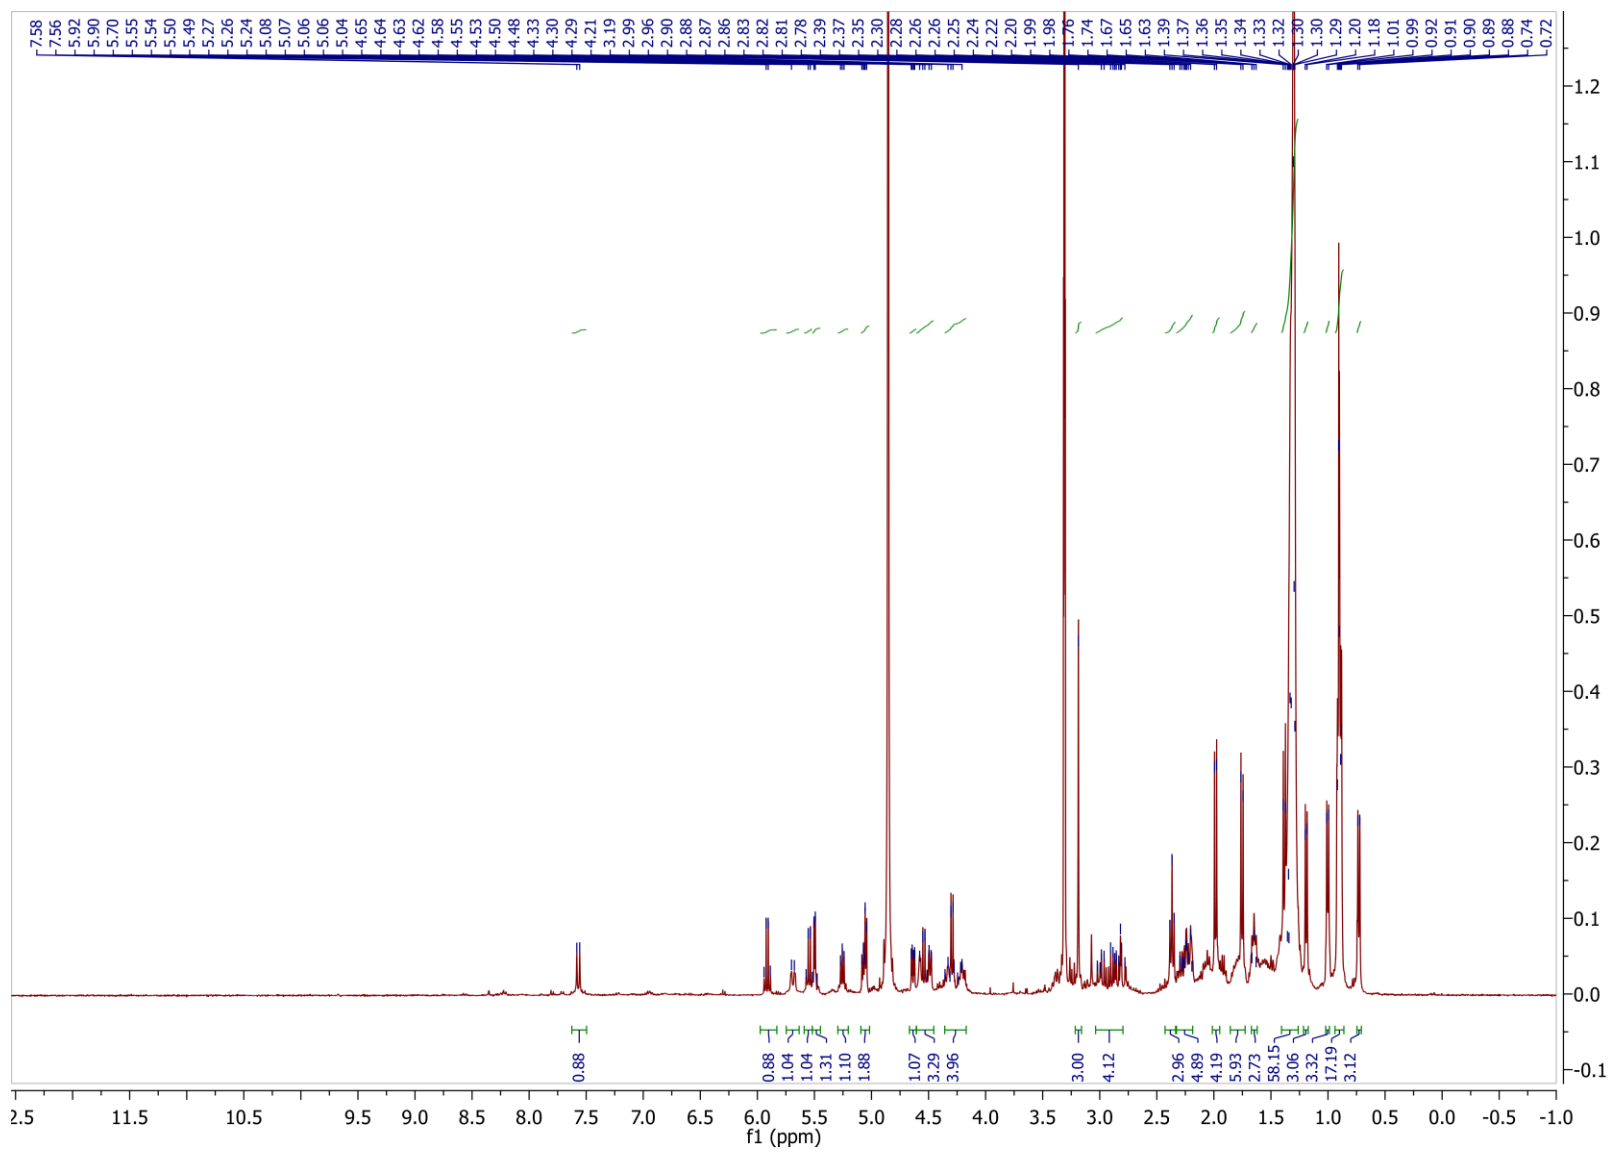

Figure S10. <sup>1</sup>H NMR spectrum of compound 5d

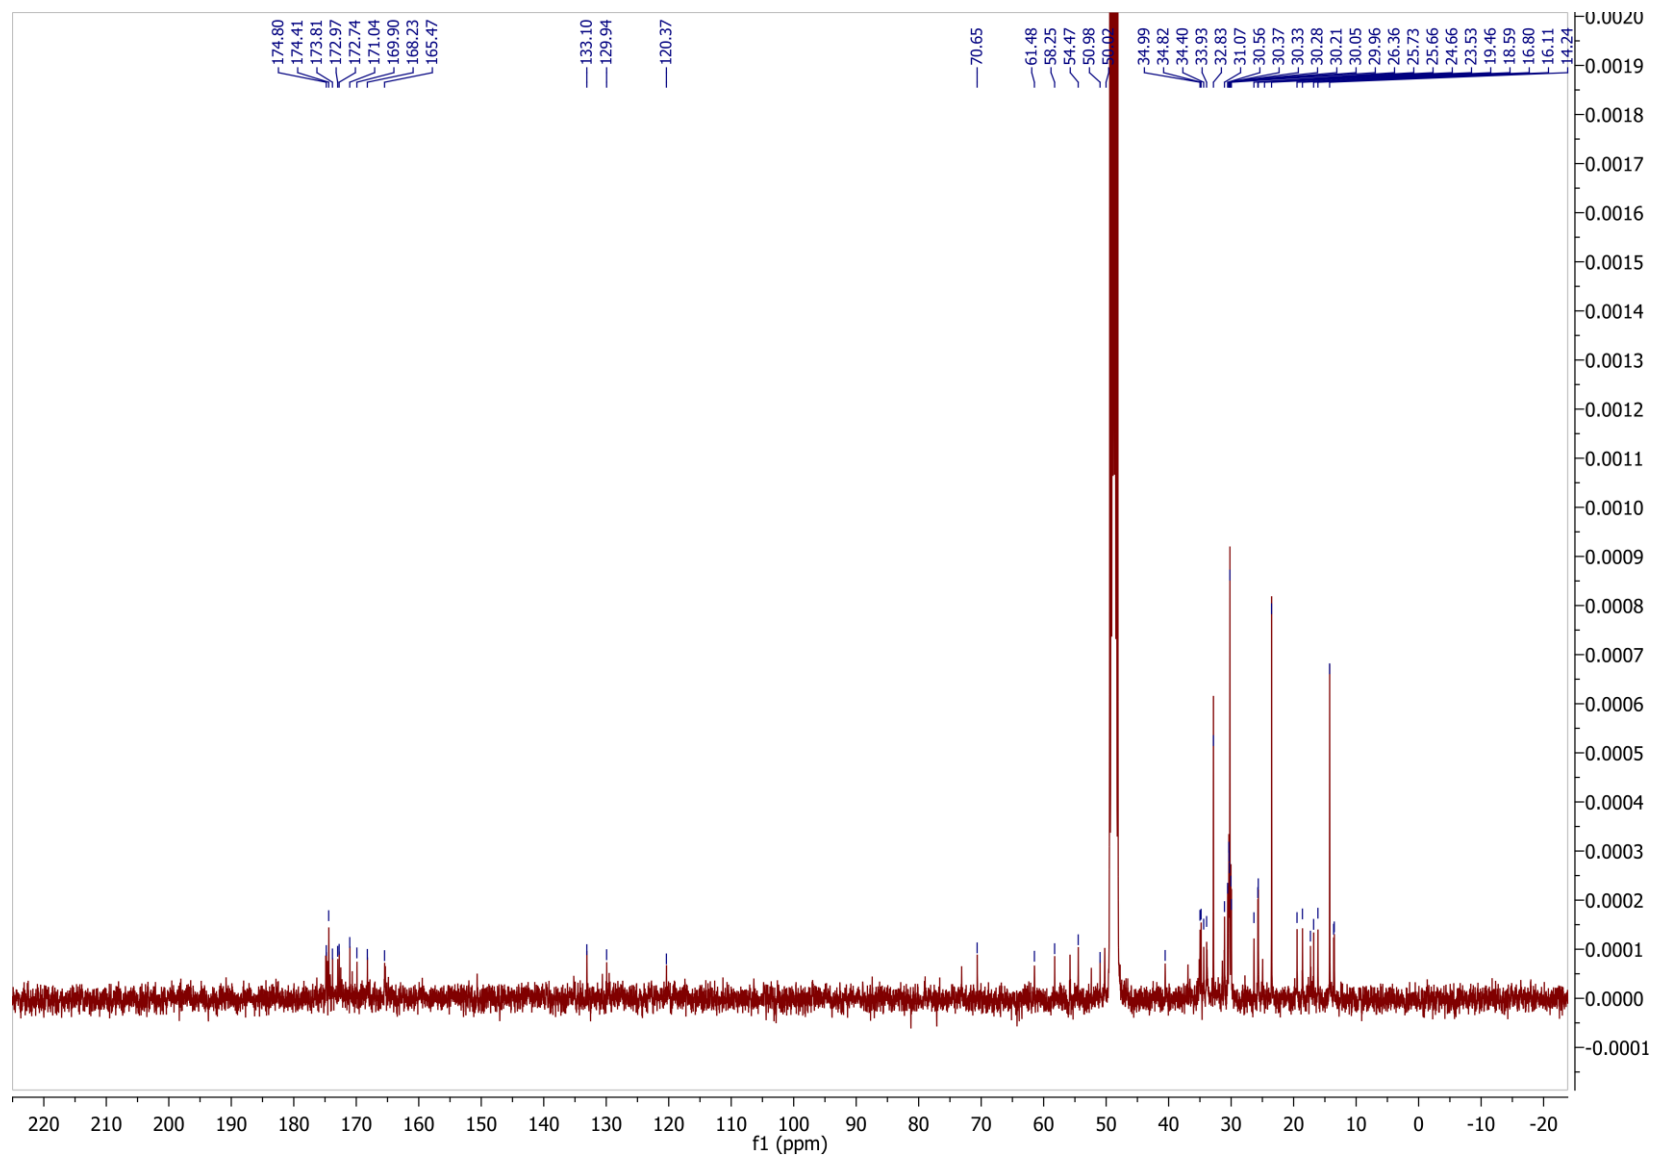

Figure S11. <sup>13</sup>C NMR spectrum of compound 5d

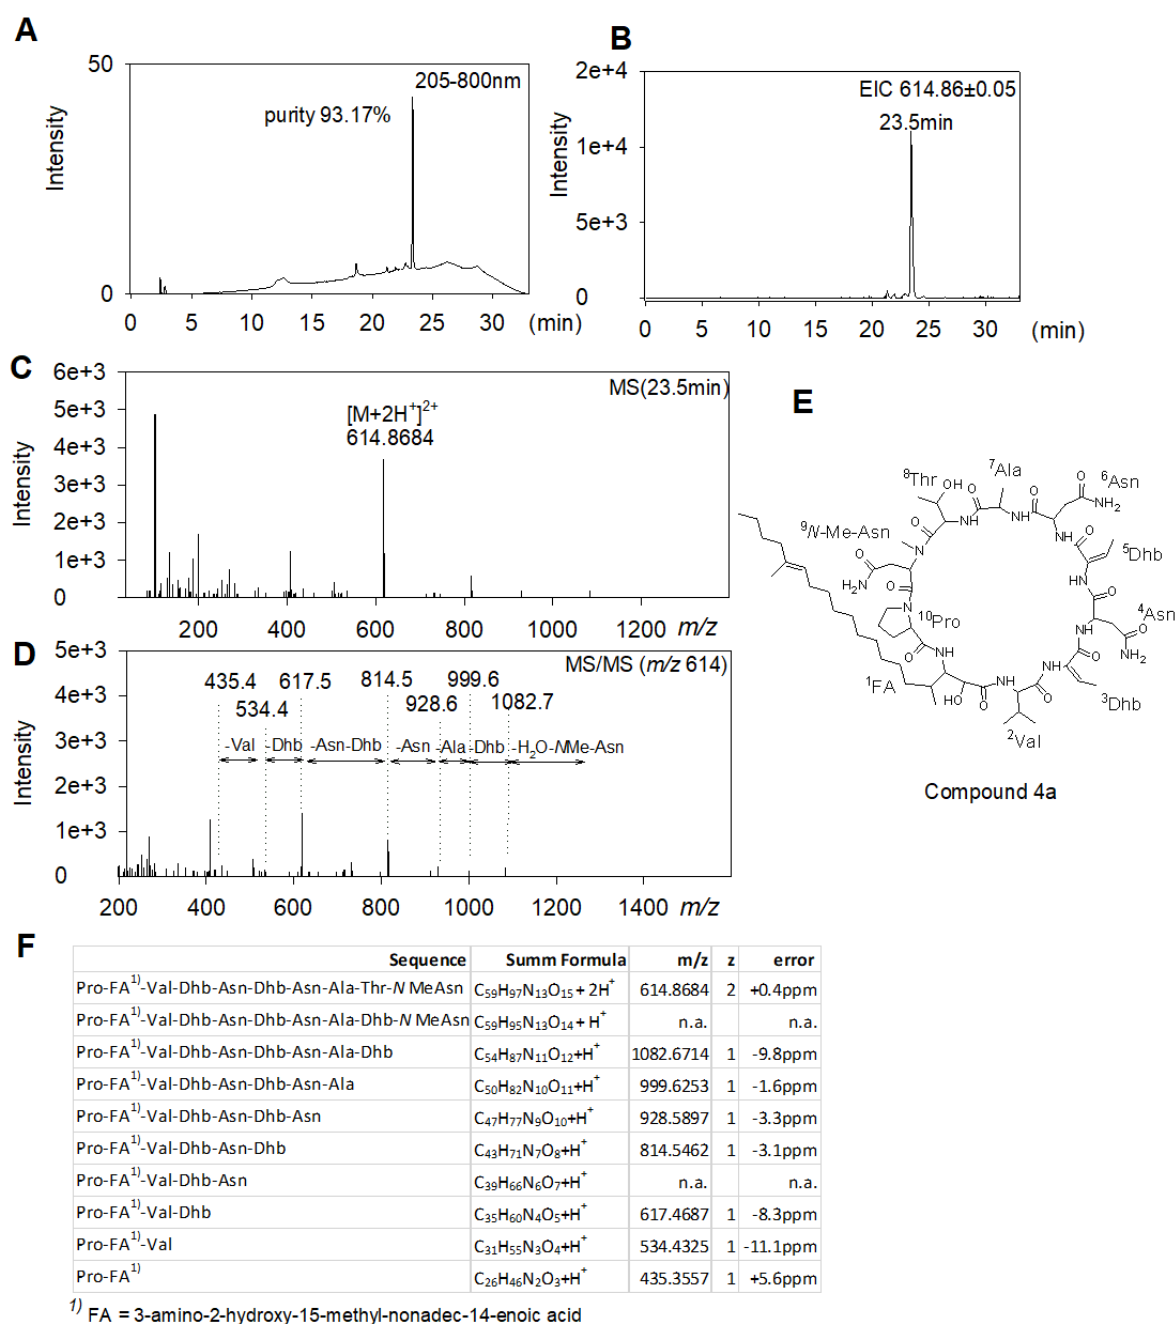

**Figure S12.** HPLC-HRMS analysis of compound **4a**. A) UV/VIS chromatogram 205-800nm. Purity was estimated based on the UV/VIS peak integral. Impurities between 17 a 23 min represent minor polyethylene glycol contaminants originating from the purification process. B) EIC chromatogram  $m/z$  614.86  $\pm$  0.05 corresponding to  $[M+2H]^{2+}$  of compound **4a**. C) Full MS spectrum at 23.5 min. D) MS/MS spectrum of  $m/z$  614 corresponding to  $[M+2H]^{2+}$  of compound **4a**. After initial water loss, all amino acids are consecutively cleaved until formation of diagnostic fragments Pro-Fa-Val-Dhb (617 Da) and Pro-FA (435 Da). E) The structure of compound **4a**. F) MS/MS data interpretation - sum formula, measured  $m/z$ , charge and error are depicted. n.a. - not available or signal below interpretable intensity.

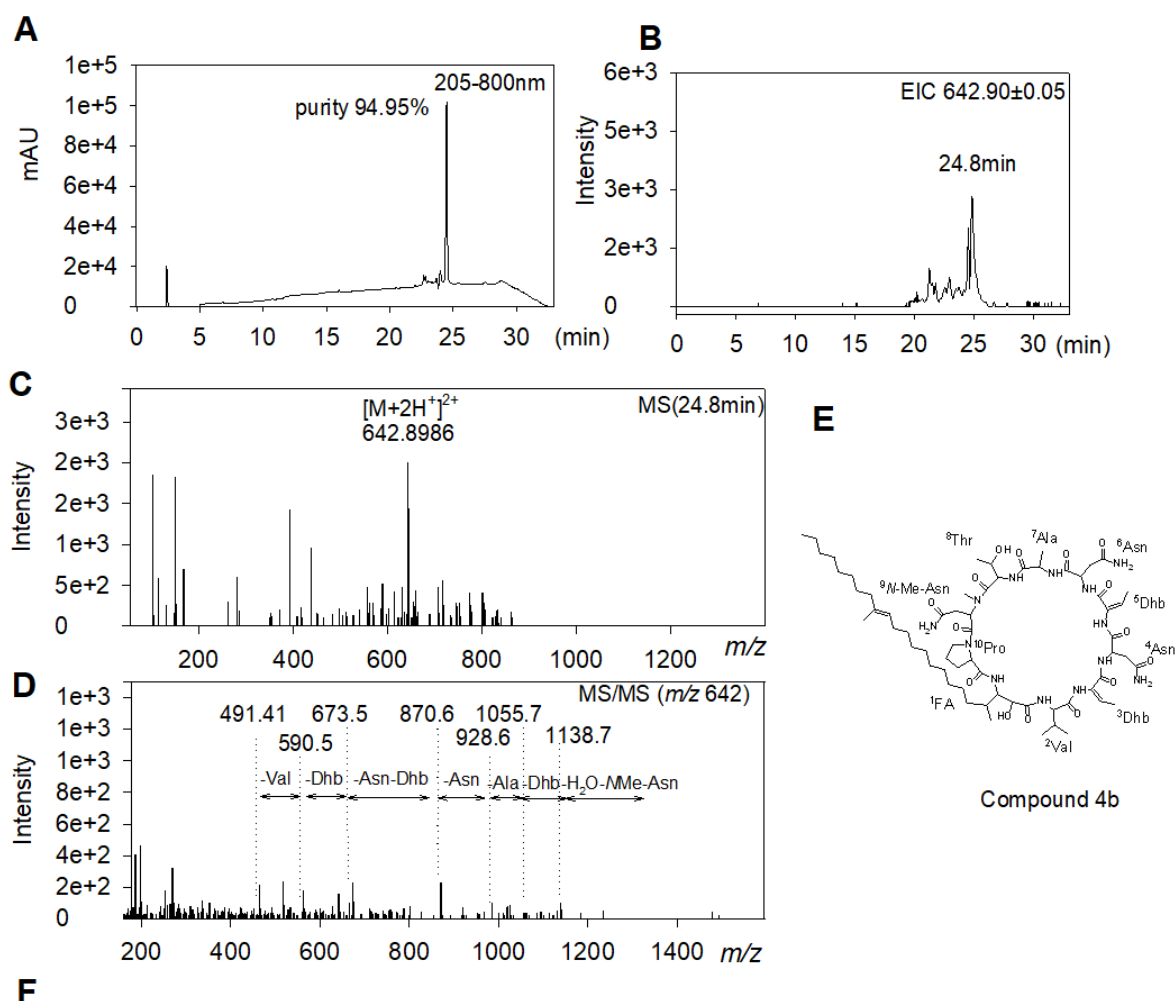

| Sequence                                                 | Summ Formula                                                                       | m/z       | z | error   |
|----------------------------------------------------------|------------------------------------------------------------------------------------|-----------|---|---------|
| Pro-FA <sup>1</sup> -Val-Dhb-Asn-Dhb-Asn-Ala-Thr-N MeAsn | C <sub>63</sub> H <sub>105</sub> N <sub>13</sub> O <sub>15</sub> + 2H <sup>+</sup> | 642.8986  | 2 | +2.0ppm |
| Pro-FA <sup>1</sup> -Val-Dhb-Asn-Dhb-Asn-Ala-Dhb-N MeAsn | C <sub>63</sub> H <sub>103</sub> N <sub>13</sub> O <sub>14</sub> + H <sup>+</sup>  | n.a.      |   | n.a.    |
| Pro-FA <sup>1</sup> -Val-Dhb-Asn-Dhb-Asn-Ala-Dhb         | C <sub>58</sub> H <sub>95</sub> N <sub>11</sub> O <sub>12</sub> + H <sup>+</sup>   | 1138.7293 | 1 | -5.1ppm |
| Pro-FA <sup>1</sup> -Val-Dhb-Asn-Dhb-Asn-Ala             | C <sub>54</sub> H <sub>90</sub> N <sub>10</sub> O <sub>11</sub> + H <sup>+</sup>   | 1055.6942 | 1 | -7.5ppm |
| Pro-FA <sup>1</sup> -Val-Dhb-Asn-Dhb-Asn                 | C <sub>51</sub> H <sub>85</sub> N <sub>9</sub> O <sub>10</sub> + H <sup>+</sup>    | 984.6459  | 1 | +3.4ppm |
| Pro-FA <sup>1</sup> -Val-Dhb-Asn-Dhb                     | C <sub>47</sub> H <sub>79</sub> N <sub>7</sub> O <sub>8</sub> + H <sup>+</sup>     | 870.6044  | 1 | +2.2ppm |
| Pro-FA <sup>1</sup> -Val-Dhb-Asn                         | C <sub>43</sub> H <sub>74</sub> N <sub>6</sub> O <sub>7</sub> + H <sup>+</sup>     | n.a.      |   | n.a.    |
| Pro-FA <sup>1</sup> -Val-Dhb                             | C <sub>39</sub> H <sub>77</sub> N <sub>4</sub> O <sub>5</sub> + H <sup>+</sup>     | 673.5267  | 1 | -0.7ppm |
| Pro-FA <sup>1</sup> -Val                                 | C <sub>35</sub> H <sub>63</sub> N <sub>3</sub> O <sub>4</sub> + H <sup>+</sup>     | 590.49    | 1 | -1.5ppm |
| Pro-FA <sup>1</sup>                                      | C <sub>30</sub> H <sub>54</sub> N <sub>2</sub> O <sub>3</sub> + H <sup>+</sup>     | 491.4168  | 1 | +8.0ppm |

<sup>1</sup>) FA = 3-amino-2-hydroxy-15-methyl-tricosan-14-enoic acid

**Figure S13:** HPLC-HRMS analysis of compound **4b**. A) UV/VIS chromatogram 205-800 nm. Purity was estimated based on the UV/VIS peak integral. Impurities between 20 and 24 min represent minor polyethylene glycol contaminants originating from the purification process. B) EIC chromatogram m/z 642.90 ± 0.05 corresponding to [M+2H]<sup>2+</sup> of compound **4b**. C) Full MS spectrum at 24.8 min. D) MS/MS spectrum of m/z 642 corresponding to [M+2H]<sup>2+</sup> of compound **4b**. After initial water loss, all amino acids are consecutively cleaved until formation of diagnostic fragments Pro-Fa-Val-Dhb (674 Da) and Pro-FA (491 Da). E) The structure of compound **4b**. F) MS/MS data interpretation - sum formula, measured m/z, charge and error are depicted. n.a. - not available or signal below interpretable intensity.

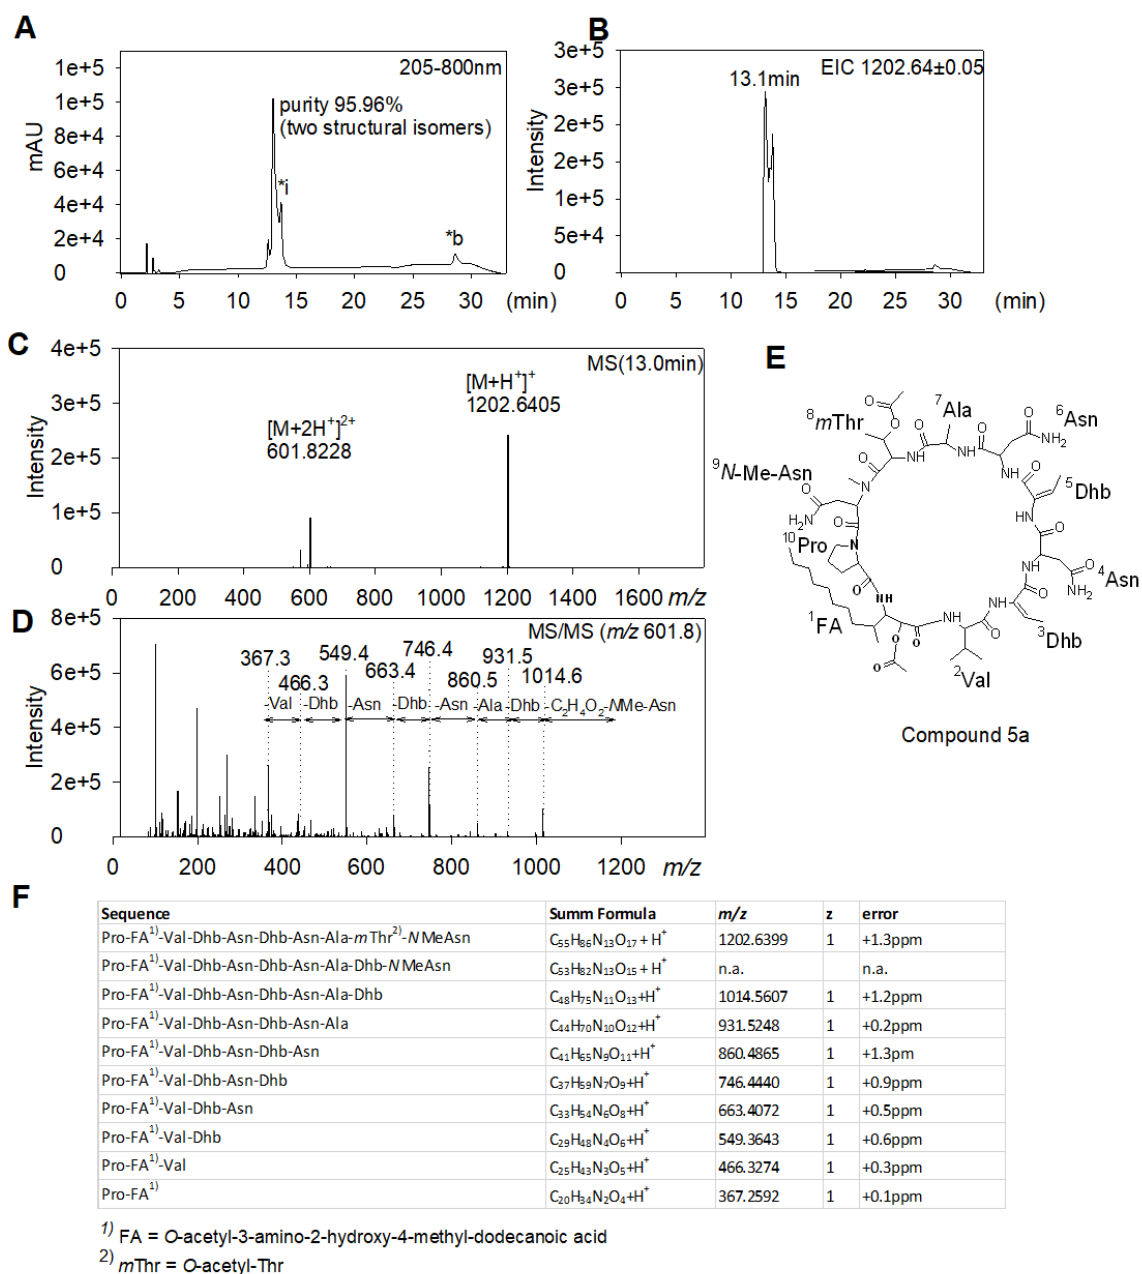

**Figure S14:** HPLC-HRMS analysis of compound **5a**. A) UV/VIS chromatogram 205–800 nm. Purity was estimated based on the UV/VIS peak integral. Impurities at 12 min represent side products (monoacylated MIN A) C) Full MS spectrum at 13.0 min. D) MS/MS spectrum of *m/z* 602 corresponding to  $[M+2H]^{2+}$  of compound **5a**. After initial carboxylic acid loss ( $-CH_3COOH$ ), all amino acids are consecutively cleaved until formation of diagnostic fragments Pro-Fa-Val-Dhb (549 Da) and Pro-FA (367 Da). E) The structure of compound **5a**. F) MS/MS data interpretation - sum formula, measured *m/z*, charge and error are depicted. n.a. - not available or signal below interpretable intensity. \*b indicates system contaminants (mostly from C<sub>18</sub> column), \*i shows peak of structural isomer of the main compound

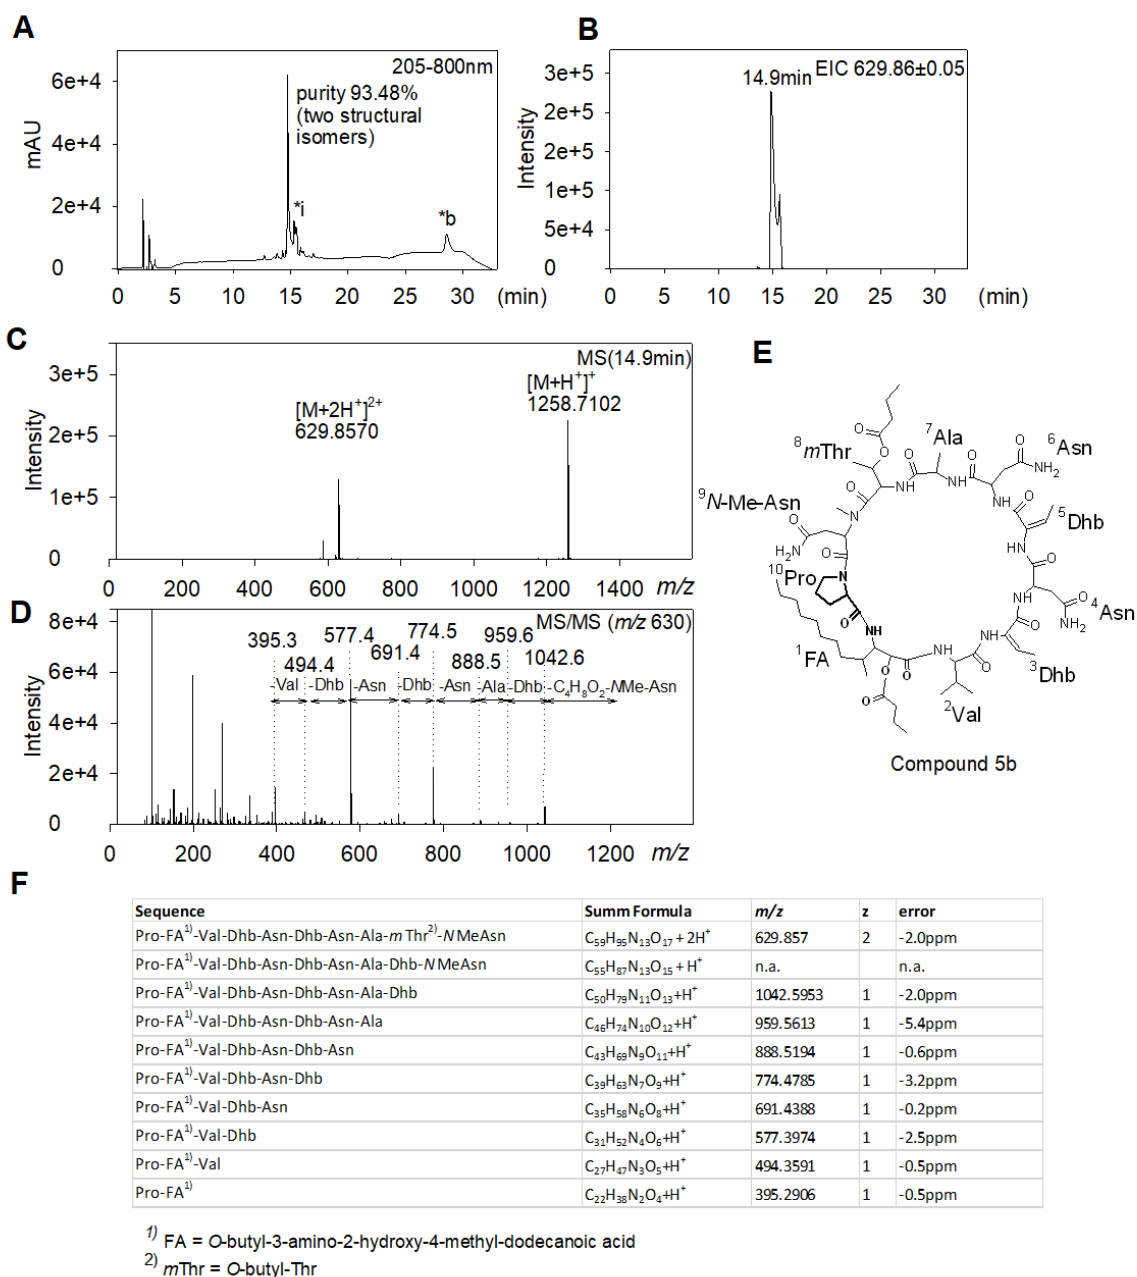

**Figure S15:** HPLC-HRMS analysis of compound **5b**. A) UV/VIS chromatogram 205-800 nm. Purity was estimated based on the UV/VIS peak integral. Impurities between 12 min and 14 min represent side products (monoacylated variants of MIN A) B) EIC chromatogram m/z 629.86 ± 0.05 corresponding to [M+2H]<sup>2+</sup> of compound **5b**. C) Full MS spectrum at 14.9 min. D) MS/MS spectrum of m/z 630 corresponding to [M+2H]<sup>2+</sup> of compound **5b**. After initial carboxylic acid loss (-CH<sub>3</sub>(CH<sub>2</sub>)<sub>2</sub>COOH), all amino acids are consecutively cleaved until formation of diagnostic fragments Pro-Fa-Val-Dhb (577 Da) and Pro-FA (395 Da). E) The structure of compound **5b**. F) MS/MS data interpretation - sum formula, measured m/z, charge and error are depicted. n.a. - not available or signal below interpretable intensity. \*b indicates system contaminants (mostly from C<sub>18</sub> column), \*i shows peak of structural isomer of the main compound



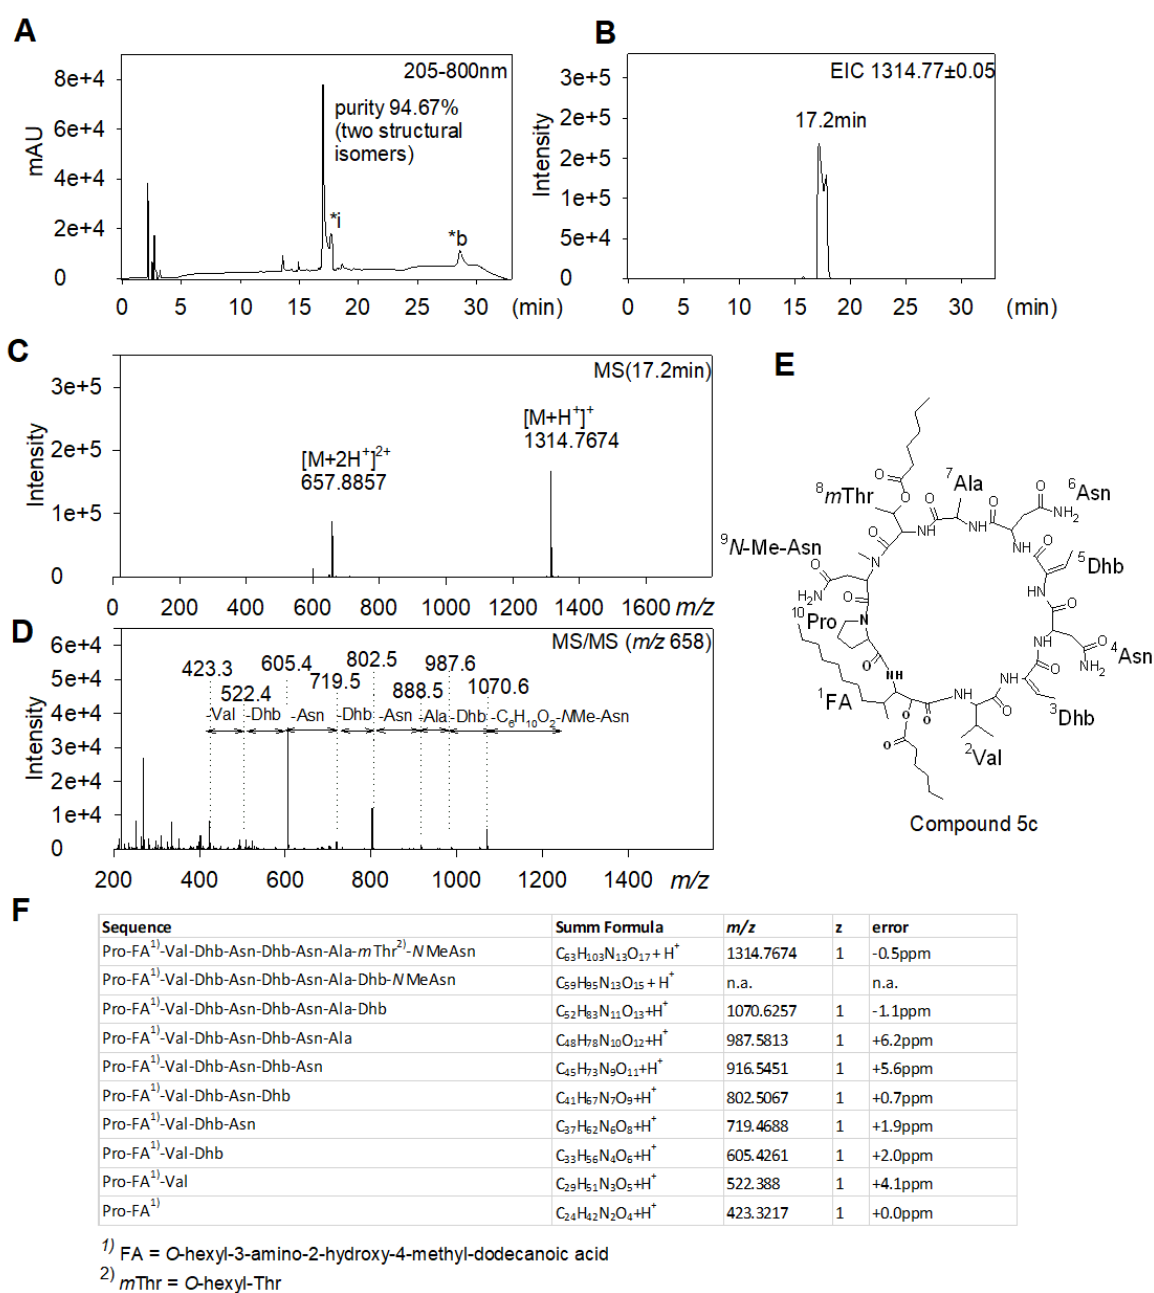

**Figure S16:** HPLC-HRMS analysis of compound **5c**. A) UV/VIS chromatogram 205-800 nm. Purity was estimated based on the UV/VIS peak integral. Impurities between 13-17 min represent side products (monoacylated variants) B) EIC chromatogram *m/z* 1314.77 ± 0.05 corresponding to [M+H]<sup>+</sup> of compound **5c**. C) Full MS spectrum at 17.2 min. D) MS/MS spectrum of *m/z* 658 corresponding to [M+2H]<sup>2+</sup> of compound **5c**. After initial carboxylic acid loss (-CH<sub>3</sub>(CH<sub>2</sub>)<sub>4</sub>COOH), all amino acids are consecutively cleaved until formation of diagnostic fragments Pro-Fa-Val-Dhb (605 Da) and Pro-FA (423 Da). E) The structure of compound **5c**. F) MS/MS data interpretation - sum formula, measured *m/z*, charge and error are depicted. n.a. - not available or signal below interpretable intensity. \*b indicates system contaminants (mostly from C<sub>18</sub> column), \*i shows peak of structural isomer of the main compound

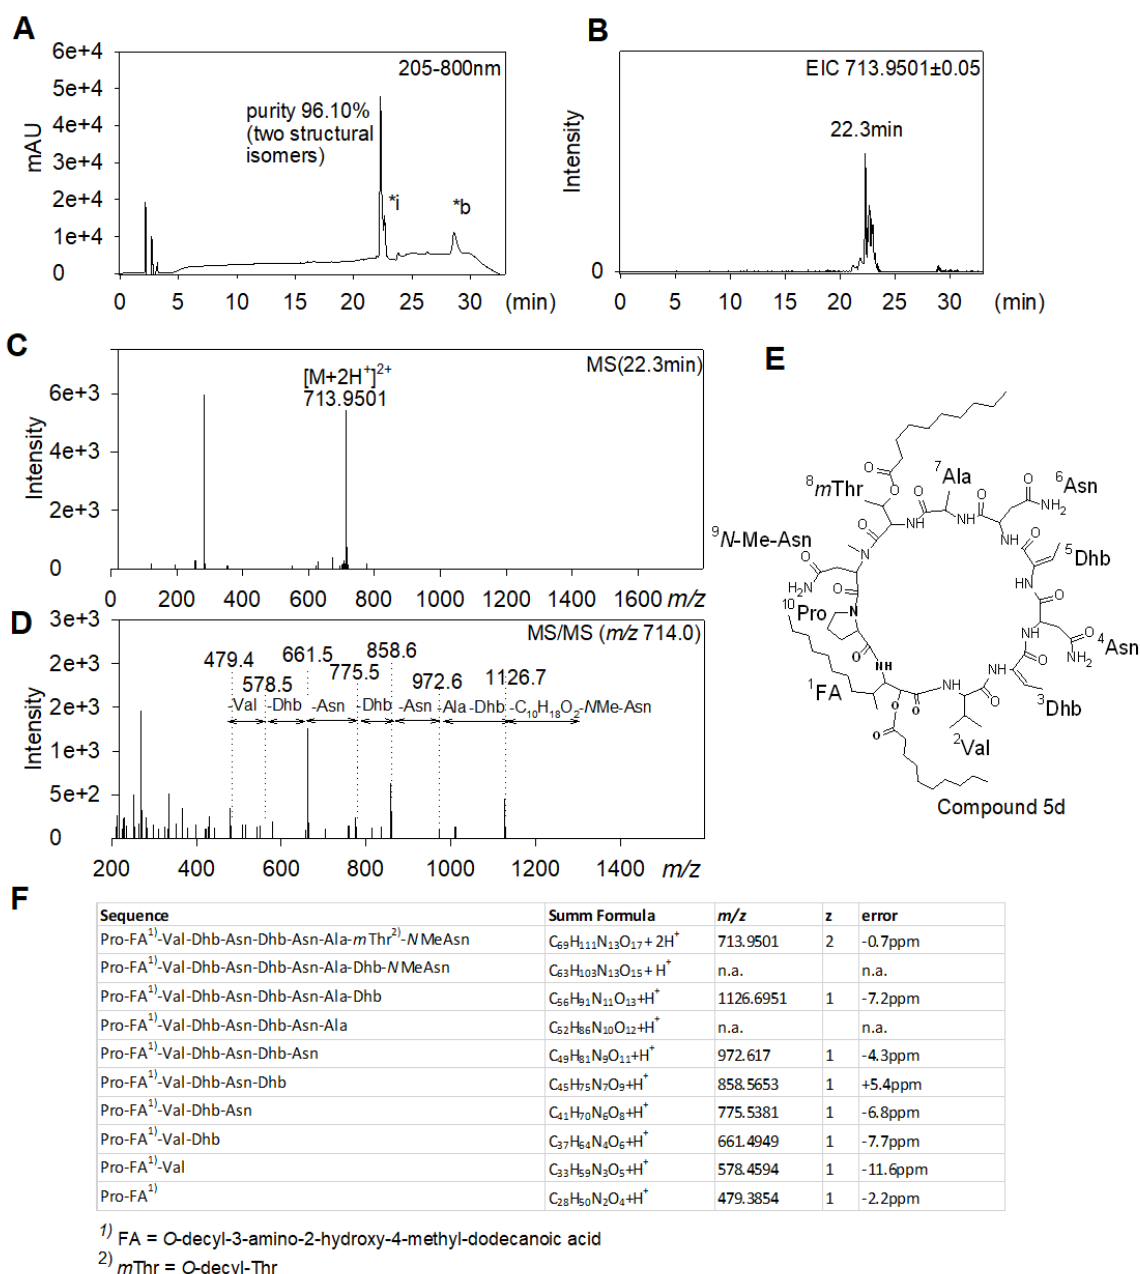

**Figure S17:** HPLC-HRMS analysis of compound **5d**. A) UV/VIS chromatogram 205-800 nm. Purity was estimated based on the UV/VIS peak integral. Impurities at 14 min represent undescribed modification of MIN A. B) EIC chromatogram *m/z* 713.95 ± 0.05 corresponding to [M+H]<sup>+</sup> of compound **5d**. C) Full MS spectrum at 22.3 min. D) MS/MS spectrum of *m/z* 714 corresponding to [M+2H]<sup>2+</sup> of compound **5d**. After initial carboxylic acid loss (-CH<sub>3</sub>(CH<sub>2</sub>)<sub>8</sub>COOH), all amino acids are consecutively cleaved until formation of diagnostic fragments Pro-Fa-Val-Dhb (661 Da) and Pro-FA (479 Da). E) The structure of compound **5d**. F) MS/MS data interpretation - sum formula, measured *m/z*, charge and error are depicted. n.a. - not available or signal below interpretable intensity. \*b indicates system contaminants (mostly from C<sub>18</sub> column), \*i shows peak of structural isomer of the main compound
